# Supplementary material
Source: PubMed Central journal article supplement (PMC4684310)
Supplement: NIHMS319881-supplement-Supplemental_Info.pdf [file NIHMS319881-supplement-Supplemental_Info.pdf]

## Supplementary Information

The model for cadmium binding to multiple, independent binding sites of equal affinity on Msh2-Msh6, following which the protein undergoes conformational change that alters its intrinsic fluorescence and ATPase activity, as well as *gfit*, the program used for global analysis of the data, can be downloaded from <http://gfit.sourceforge.net>.

## Supplementary Methods

ATP and ATP $\gamma$ S binding to Msh2-Msh6 was measured by nitrocellulose membrane binding assays (Antony and Hingorani, 2003). Membranes were treated with 0.5 N NaOH for 2 minutes, washed with water and equilibrated in Buffer B (20 mM Tris-HCl, pH 8.0, 100 mM NaCl, 5 mM MgCl<sub>2</sub>, 5 % glycerol). In 15  $\mu$ l reactions Msh2-Msh6 (1  $\mu$ M) was incubated for 10 minutes in Buffer B with  $\alpha$ -<sup>32</sup>P-ATP (0 – 150  $\mu$ M) at 4 °C or with <sup>35</sup>S-ATP $\gamma$ S (0 – 200  $\mu$ M) at 25 °C, in the presence of CdCl<sub>2</sub> (0 – 300  $\mu$ M), then 10  $\mu$ l of each reaction was filtered through a membrane, followed by 150  $\mu$ l buffer. Bound nucleotide on the membranes was quantified by PhosphorImager and plotted *versus* total nucleotide, and the data were fit to a quadratic equation.

Increase in turbidity (630 nm) in the presence of CdCl<sub>2</sub> was measured over time in a stopped-flow instrument by mixing 60  $\mu$ l of Msh2-Msh6 (2  $\mu$ M) or MutS (2  $\mu$ M) with 60  $\mu$ l of 400  $\mu$ M – 4 mM CdCl<sub>2</sub> in Buffer A (final concentrations: 1  $\mu$ M Msh2-Msh6 or MutS, 200  $\mu$ M – 2 mM CdCl<sub>2</sub>).

## Supplementary Figure Legends

FIGURE S1: Nucleotide binding to Msh2-Msh6. (A) Nitrocellulose membrane filtration assays show 0.8 – 1  $\mu\text{M}$   $\alpha^{32}\text{P}$ -ATP binding 1  $\mu\text{M}$  Msh2-Msh6 with apparent  $K_D$  of 3 – 8  $\mu\text{M}$  at 0 (●) 100 (○) and 300  $\mu\text{M}$  (□)  $\text{CdCl}_2$ , suggesting that ATP binding is not as susceptible to cadmium-mediated inhibition; a maximum stoichiometry of 1 ATP per Msh2-Msh6 with  $K_D \sim 7 \mu\text{M}$ , has been reported previously using this assay (Antony and Hingorani, 2003). (B)  $^{35}\text{S}$ -ATP $\gamma\text{S}$  binding saturates at  $\sim 2$  molecules per Msh2-Msh6 (1  $\mu\text{M}$ ) in the absence of  $\text{CdCl}_2$  (red), consistent with previous reports (Antony and Hingorani, 2003). In the presence of 200  $\mu\text{M}$   $\text{CdCl}_2$ , however, ATP $\gamma\text{S}$  binding does not saturate even at  $>12$  molecules per Msh2-Msh6 (green), which suggests excess ATP $\gamma\text{S}$  binding to the multiple  $\text{Cd}^{2+}$  ions coordinated by ligands on Msh2-Msh6.

FIGURE S2: Mixing of Msh2-Msh6 with  $\text{CdCl}_2$  eventually leads to increase in the turbidity of the solution (630 nm), indicating protein aggregation at very high  $\text{CdCl}_2$  concentration of 1 mM whereas *T. aquaticus* MutS remains unchanged even at 2 mM  $\text{CdCl}_2$ .

### Reference

Antony, E., and Hingorani, M.M. (2003). Mismatch recognition-coupled stabilization of Msh2-Msh6 in an ATP-bound state at the initiation of DNA repair. *Biochemistry* 42, 7682-7693.

A. Effect of  $\text{Cd}^{2+}$  on ATP binding by Msh2-6

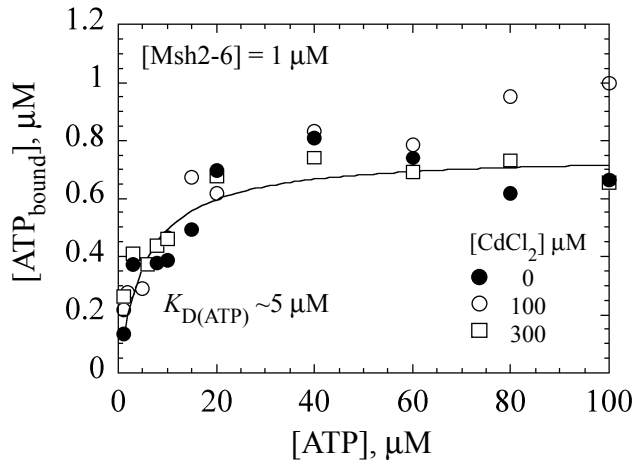

B. Effect of  $\text{Cd}^{2+}$  on  $\text{ATP}\gamma\text{S}$  binding by Msh2-6

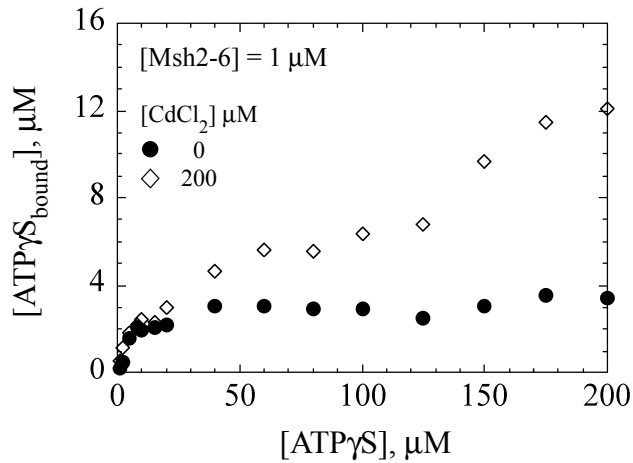

A. Cd<sup>2+</sup> effects on *S. cerevisiae* Msh2-6 structure

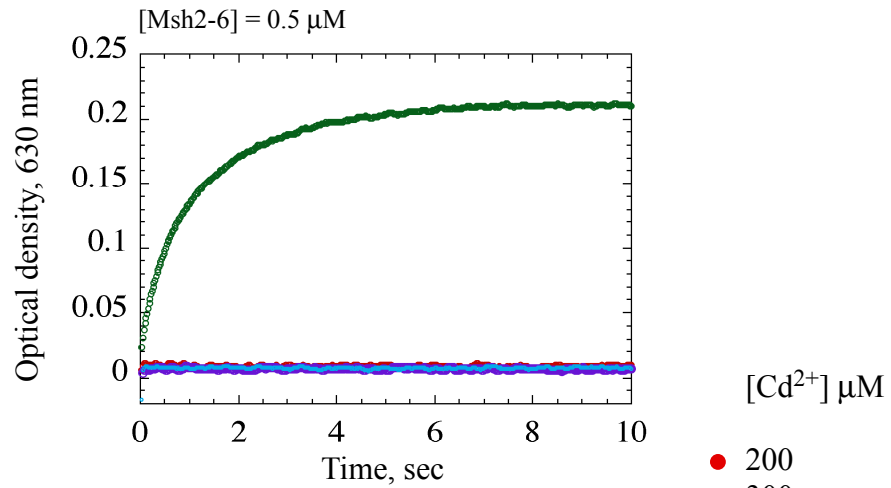

B. Cd<sup>2+</sup> effects on *T. aquaticus* MutS structure

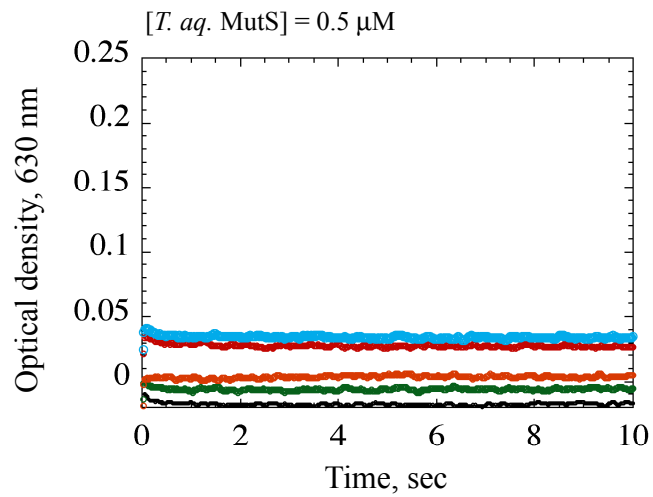

Supplementary Figure 2
